# Supplementary material for: Bioinformatic Analysis Reveals Conservation of Intrinsic Disorder in the Linker Sequences of Prokaryotic Dual-family Immunophilin Chaperones
Source: PubMed Central journal article supplement (PMC5852385; doi:10.1016/j.csbj.2017.12.002), 2017-12-30
Supplement: mmc2.pdf [file mmc2.pdf]

## Supplementary Material 2: List of all CFBP organisms

In the "Others" category, two multicellular organisms are highlighted (nematode, shrimp).

The nematode (hookworm in man and other mammals) has a unique C-terminus and short N-terminus.

In the arthropod (small shrimp), the CYN part is missing ~60 aa, including the "N-terminal loop" (19-24 in hCyPA).

GAL66646.1 was not used because of its short N-terminus.

| Species                                                   | Domain structure | Accession #    | Phylogeny     |
|-----------------------------------------------------------|------------------|----------------|---------------|
| <b><u>Phylum Spirochaetes</u></b>                         |                  |                |               |
| <i>Borrelia crocidurae</i>                                | CYN-FKBP         | WP_025400716.1 | Spirochetes   |
| <i>Borrelia crocidurae</i> str. Achema                    | CYN-FKBP         | AFI31197.1     | Spirochetes   |
| <i>Borrelia duttonii</i>                                  | CYN-FKBP         | WP_012538168.1 | Spirochetes   |
| <i>Borrelia hermsii</i> DAH                               | CYN-FKBP         | WP_012422177.1 | Spirochetes   |
| <i>Borrelia hispanica</i>                                 | CYN-FKBP         | WP_024655403.1 | Spirochetes   |
| <i>Borrelia persica</i>                                   | CYN-FKBP         | WP_024653864.1 | Spirochetes   |
| <i>Borrelia recurrentis</i>                               | CYN-FKBP         | WP_012538884.1 | Spirochetes   |
| <i>Borrelia turicatae</i>                                 | CYN-FKBP         | WP_011772360.1 | Spirochetes   |
| <i>Sphaerochaeta coccoides</i>                            | CYN-FKBP         | WP_013740452.1 | Spirochetes   |
| <i>Sphaerochaeta globosa</i>                              | CYN-FKBP         | WP_013608701.1 | Spirochetes   |
| <i>Sphaerochaeta pleomorpha</i> str. Grapes               | CYN-FKBP         | AEV29721.1     | Spirochetes   |
| <i>Spirochaeta lutea</i>                                  | CYN-FKBP         | WP_037548329.1 | Spirochetes   |
| <i>Spirochaeta Africana</i>                               | CYN-FKBP         | WP_014456714.1 | Spirochetes   |
| <i>Spirochaetes bacterium</i> GWC2_52_13                  | CYN-FKBP         | OHD32850.1     | Spirochetes   |
| <i>Treponema azotonutricium</i> ZAS-9                     | CYN-FKBP         | WP_015710234.1 | Spirochetes   |
| <i>Treponema brennaborensense</i>                         | CYN-FKBP         | WP_013757191.1 | Spirochetes   |
| <i>Treponema caldaria</i> DSM 12168                       | CYN-FKBP         | WP_013967678.1 | Spirochetes   |
| <i>Treponema denticola</i>                                | CYN-FKBP         | WP_002680321.1 | Spirochetes   |
| <i>Treponema maltophilum</i>                              | CYN-FKBP         | EPF32053.1     | Spirochetes   |
| <i>Treponema phagedenis</i>                               | CYN-FKBP         | EFW38648.1     | Spirochetes   |
| <i>Treponema primitia</i> ZAS-2                           | CYN-FKBP         | WP_015709565.1 | Spirochetes   |
| <i>Treponema putidum</i>                                  | CYN-FKBP         | WP_044979872.1 | Spirochetes   |
| <i>Treponema saccharophilum</i>                           | CYN-FKBP         | WP_002706539.1 | Spirochetes   |
| <i>Treponema socranskii</i>                               | CYN-FKBP         | ERF61397.1     | Spirochetes   |
| <i>Treponema succinifaciens</i> DSM2489                   | CYN-FKBP         | WP_013700291.1 | Spirochetes   |
| <i>Treponema vincentii</i> ATCC 35580                     | CYN-FKBP         | WP_006188840.1 | Spirochetes   |
| <b><u>Phylum Bacteroidetes (mostly Flavobacteria)</u></b> |                  |                |               |
| <i>Apibacter mensalis</i>                                 | CYN-FKBP         | WP_055425959.1 | Flavobacteria |
| <i>Aquimarina agarivorans</i>                             | CYN-FKBP         | WP_010523173.1 | Flavobacteria |
| <i>Aquimarina longa</i>                                   | CYN-FKBP         | WP_062053470.1 | Flavobacteria |
| <i>Aquimarina macrocephali</i>                            | CYN-FKBP         | WP_024768822.1 | Flavobacteria |
| <i>Aquimarina megaterium</i>                              | CYN-FKBP         | WP_025666008.1 | Flavobacteria |
| <i>Aquimarina pacifica</i>                                | CYN-FKBP         | WP_025743611.1 | Flavobacteria |
| <i>Aquimarina spongiae</i>                                | CYN-FKBP         | WP_073315242.1 | Flavobacteria |
| <i>Aequorivita capsosiphonis</i>                          | CYN-FKBP         | WP_026450730.1 | Flavobacteria |

|                                               |          |                |               |
|-----------------------------------------------|----------|----------------|---------------|
| <i>Aequorivita</i> sp. D-24                   | CYN-FKBP | WP_062622682.1 | Flavobacteria |
| <i>Aequorivita</i> sublithincola              | CYN-FKBP | WP_014781106.1 | Flavobacteria |
| <i>Aequorivita</i> vladivostokensis           | CYN-FKBP | WP_045081509.1 | Flavobacteria |
| <i>Algibacter</i> lectus                      | CYN-FKBP | GAL78289.1     | Flavobacteria |
| <i>Arenibacter</i> certesii                   | CYN-FKBP | WP_026812083.1 | Flavobacteria |
| <i>Arenitalea</i> lutea                       | CYN-FKBP | WP_019387329.1 | Flavobacteria |
| <i>Arenibacter</i> palladensis                | CYN-FKBP | SHF91915.1     | Flavobacteria |
| <i>Bacteroidetes</i> bacterium MedPE-SWsnd-G1 | CYN-FKBP | OIQ37634.1     | Flavobacteria |
| <i>Bacteroidetes</i> bacterium OLB9           | CYN-FKBP | KXK39650.1     | Flavobacteria |
| <i>Bergeyella</i> zoohelcum                   | CYN-FKBP | WP_002663385.1 | Flavobacteria |
| <i>Bizionia</i> argentinensis                 | CYN-FKBP | WP_008635427.1 | Flavobacteria |
| <i>Bizionia</i> paragogiae                    | CYN-FKBP | SDZ72777.1     | Flavobacteria |
| <i>Capnocytophaga</i> canimorsus Cc5          | CYN-FKBP | WP_013997216.1 | Flavobacteria |
| <i>Capnocytophaga</i> canimorsus Cc5          | CYN-FKBP | WP_013997324.1 | Flavobacteria |
| <i>Capnocytophaga</i> cynodegmi               | CYN-FKBP | CEN32541.1     | Flavobacteria |
| <i>Capnocytophaga</i> gingivalis ATCC 33624   | CYN-FKBP | WP_002665439.1 | Flavobacteria |
| <i>Capnocytophaga</i> gingivalis ATCC 33624   | CYN-FKBP | WP_002667121.1 | Flavobacteria |
| <i>Capnocytophaga</i> sputigena Capno         | CYN-FKBP | WP_002679844.1 | Flavobacteria |
| <i>Capnocytophaga</i> ochracea F0287          | CYN-FKBP | WP_015782565.1 | Flavobacteria |
| <i>Capnocytophaga</i> sp. Oral taxon 324      | CYN-FKBP | WP_009411812.1 | Flavobacteria |
| <i>Capnocytophaga</i> sp. Oral taxon 324      | CYN-FKBP | WP_009411339.1 | Flavobacteria |
| <i>Cellulophaga</i> algicola DSM 14327        | CYN-FKBP | WP_013551507.1 | Flavobacteria |
| <i>Cellulophaga</i> algicola DSM 14327        | CYN-FKBP | WP_013549201.1 | Flavobacteria |
| <i>Cellulophaga</i> baltica                   | CYN-FKBP | WP_025614578.1 | Flavobacteria |
| <i>Cellulophaga</i> geojensis KL-A            | CYN-FKBP | EWH14126.1     | Flavobacteria |
| <i>Cellulophaga</i> lytica DSM 7489           | CYN-FKBP | WP_013619851.1 | Flavobacteria |
| <i>Cellulophaga</i> lytica                    | CYN-FKBP | APU08853.1     | Flavobacteria |
| <i>Chryseobacterium</i> angstadtii            | CYN-FKBP | WP_048507577.1 | Flavobacteria |
| <i>Chryseobacterium</i> antarcticum           | CYN-FKBP | WP_051803836.1 | Flavobacteria |
| <i>Chryseobacterium</i> aquaticum             | CYN-FKBP | WP_056014146.1 | Flavobacteria |
| <i>Chryseobacterium</i> arachidis             | CYN-FKBP | WP_072959387.1 | Flavobacteria |
| <i>Chryseobacterium</i> arthrosphaerae        | CYN-FKBP | OCA73542.1     | Flavobacteria |
| <i>Chryseobacterium</i> artocarpi             | CYN-FKBP | WP_065394712.1 | Flavobacteria |
| <i>Chryseobacterium</i> balustinum            | CYN-FKBP | WP_079466867.1 | Flavobacteria |
| <i>Chryseobacterium</i> bovis                 | CYN-FKBP | WP_076782045.1 | Flavobacteria |
| <i>Chryseobacterium</i> caeni                 | CYN-FKBP | WP_034671276.1 | Flavobacteria |
| <i>Chryseobacterium</i> carnipullorum         | CYN-FKBP | WP_073335862.1 | Flavobacteria |
| <i>Chryseobacterium</i> chaponense            | CYN-FKBP | SIS91935.1     | Flavobacteria |
| <i>Chryseobacterium</i> contaminans           | CYN-FKBP | WP_073300115.1 | Flavobacteria |
| <i>Chryseobacterium</i> cucumeris             | CYN-FKBP | WP_062670346.1 | Flavobacteria |
| <i>Chryseobacterium</i> culicis               | CYN-FKBP | SEH32004.1     | Flavobacteria |
| <i>Chryseobacterium</i> daeguense             | CYN-FKBP | WP_034752384.1 | Flavobacteria |
| <i>Chryseobacterium</i> formosense            | CYN-FKBP | WP_034676143.1 | Flavobacteria |
| <i>Chryseobacterium</i> gallinarum            | CYN-FKBP | WP_053328736.1 | Flavobacteria |
| <i>Chryseobacterium</i> gambrini              | CYN-FKBP | WP_076390416.1 | Flavobacteria |
| <i>Chryseobacterium</i> gleum                 | CYN-FKBP | WP_002980016.1 | Flavobacteria |
| <i>Chryseobacterium</i> greenlandense         | CYN-FKBP | WP_059136803.1 | Flavobacteria |

|                                                |          |                |               |
|------------------------------------------------|----------|----------------|---------------|
| <i>Chryseobacterium gregarium</i>              | CYN-FKBP | WP_034761027.1 | Flavobacteria |
| <i>Chryseobacterium haifense</i>               | CYN-FKBP | WP_084186087.1 | Flavobacteria |
| <i>Chryseobacterium hungaricum</i>             | CYN-FKBP | SDG10680.1     | Flavobacteria |
| <i>Chryseobacterium indologenes</i>            | CYN-FKBP | WP_047098396.1 | Flavobacteria |
| <i>Chryseobacterium indoltheticum</i>          | CYN-FKBP | WP_076558645.1 | Flavobacteria |
| <i>Chryseobacterium jejuense</i>               | CYN-FKBP | SDI33762.1     | Flavobacteria |
| <i>Chryseobacterium jeonii</i>                 | CYN-FKBP | KIA90404.1     | Flavobacteria |
| <i>Chryseobacterium joostei</i>                | CYN-FKBP | WP_076355767.1 | Flavobacteria |
| <i>Chryseobacterium koreense</i>               | CYN-FKBP | WP_083993749.1 | Flavobacteria |
| <i>Chryseobacterium limigenitum</i>            | CYN-FKBP | SFZ90634.1     | Flavobacteria |
| <i>Chryseobacterium luteum</i>                 | CYN-FKBP | WP_034707310.1 | Flavobacteria |
| <i>Chryseobacterium molle</i>                  | CYN-FKBP | SHK62632.1     | Flavobacteria |
| <i>Chryseobacterium oleae</i>                  | CYN-FKBP | SFN39639.1     | Flavobacteria |
| <i>Chryseobacterium oranimense</i>             | CYN-FKBP | WP_040999021.1 | Flavobacteria |
| <i>Chryseobacterium palustre</i>               | CYN-FKBP | WP_051190467.1 | Flavobacteria |
| <i>Chryseobacterium piperi</i>                 | CYN-FKBP | WP_034687466.1 | Flavobacteria |
| <i>Chryseobacterium piscicola</i>              | CYN-FKBP | SIS72842.1     | Flavobacteria |
| <i>Chryseobacterium polytrichastri</i>         | CYN-FKBP | SHL10481.1     | Flavobacteria |
| <i>Chryseobacterium scophthalmum</i>           | CYN-FKBP | WP_074228863.1 | Flavobacteria |
| <i>Chryseobacterium shigense</i>               | CYN-FKBP | WP_076510030.1 | Flavobacteria |
| <i>Chryseobacterium soldanellicola</i>         | CYN-FKBP | SDR14823.1     | Flavobacteria |
| <i>Chryseobacterium solincola</i>              | CYN-FKBP | WP_039344647.1 | Flavobacteria |
| <i>Chryseobacterium sp. Hurlbut01</i>          | CYN-FKBP | KNB60550.1     | Flavobacteria |
| <i>Chryseobacterium taeanense</i>              | CYN-FKBP | SDH88102.1     | Flavobacteria |
| <i>Chryseobacterium taihuense</i>              | CYN-FKBP | SDM11487.1     | Flavobacteria |
| <i>Chryseobacterium taiwanense</i>             | CYN-FKBP | WP_039365462.1 | Flavobacteria |
| <i>Chryseobacterium tenax</i>                  | CYN-FKBP | WP_034980653.1 | Flavobacteria |
| <i>Chryseobacterium treverense</i>             | CYN-FKBP | SFI64973.1     | Flavobacteria |
| <i>Chryseobacterium ureilyticum</i>            | CYN-FKBP | WP_076552336.1 | Flavobacteria |
| <i>Chryseobacterium wanjuense</i>              | CYN-FKBP | SEW20341.1     | Flavobacteria |
| <i>Cloacibacterium normanense</i>              | CYN-FKBP | WP_069798429.1 | Flavobacteria |
| <i>Croceibacter atlanticus</i>                 | CYN-FKBP | WP_013187883.1 | Flavobacteria |
| <i>Crocinitomix catalasitica</i>               | CYN-FKBP | WP_084274406.1 | Flavobacteria |
| <i>Cruoricaptor ignavus</i>                    | CYN-FKBP | SHI54158.1     | Flavobacteria |
| <i>Cryomorpaceae bacterium</i>                 | CYN-FKBP | KRP28643.1     | Flavobacteria |
| <i>Desulfotalea psychrophila</i>               | CYN-FKBP | CAG36374.1     | Flavobacteria |
| <i>Dokdonia donghaensis (multiple strains)</i> | CYN-FKBP | WP_021778660.1 | Flavobacteria |
| <i>Elizabethkingia anophelis</i>               | CYN-FKBP | OCW74537.1     | Flavobacteria |
| <i>Elizabethkingia meningoseptica</i>          | CYN-FKBP | EOR30682.1     | Flavobacteria |
| <i>Elizabethkingia miricola</i>                | CYN-FKBP | AJW61711.1     | Flavobacteria |
| <i>Eudoraea adriatica</i>                      | CYN-FKBP | WP_019668468.1 | Flavobacteria |
| <i>Flagellimonas sp.</i>                       | CYN-FKBP | WP_055397607.1 | Flavobacteria |
| <i>Flavobacterium aquidurense</i>              | CYN-FKBP | WP_055098333.1 | Flavobacteria |
| <i>Flavobacteria bacterium BAL38</i>           | CYN-FKBP | EAZ96145.1     | Flavobacteria |
| <i>Flavobacteria bacterium BBFL7</i>           | CYN-FKBP | WP_006795114.1 | Flavobacteria |
| <i>Flavobacteriaceae bacterium</i>             | CYN-FKBP | OIP45389.1     | Flavobacteria |
| <i>Flavobacteriales bacterium</i>              | CYN-FKBP | WP_013306554.1 | Flavobacteria |

|                                              |          |                |               |
|----------------------------------------------|----------|----------------|---------------|
| <i>Flavobacterium akiainvivens</i>           | CYN-FKBP | WP_054407344.1 | Flavobacteria |
| <i>Flavobacterium antarcticum</i>            | CYN-FKBP | WP_022827013.1 | Flavobacteria |
| <i>Flavobacterium beibuense</i>              | CYN-FKBP | KGO82584.1     | Flavobacteria |
| <i>Flavobacterium branchiophilum</i>         | CYN-FKBP | WP_014084292.1 | Flavobacteria |
| <i>Flavobacterium cauense</i>                | CYN-FKBP | ESU21328.1     | Flavobacteria |
| <i>Flavobacterium chungangense</i>           | CYN-FKBP | WP_031454950.1 | Flavobacteria |
| <i>Flavobacterium columnare</i>              | CYN-FKBP | AMA49476.1     | Flavobacteria |
| <i>Flavobacterium daejeonense</i>            | CYN-FKBP | WP_055090896.1 | Flavobacteria |
| <i>Flavobacterium defluvii</i>               | CYN-FKBP | SHH23133.1     | Flavobacteria |
| <i>Flavobacterium enshiense</i>              | CYN-FKBP | WP_023573905.1 | Flavobacteria |
| <i>Flavobacterium filum</i>                  | CYN-FKBP | WP_051220716.1 | Flavobacteria |
| <i>Flavobacterium frigoris</i>               | CYN-FKBP | WP_007137991.1 | Flavobacteria |
| <i>Flavobacterium frigoris</i>               | CYN-FKBP | WP_007138038.1 | Flavobacteria |
| <i>Flavobacterium fryxellicola</i>           | CYN-FKBP | OAB27313.1     | Flavobacteria |
| <i>Flavobacterium gilvum</i>                 | CYN-FKBP | AOW09633.1     | Flavobacteria |
| <i>Flavobacterium haoranii</i>               | CYN-FKBP | SHJ78198.1     | Flavobacteria |
| <i>Flavobacterium hibernum</i>               | CYN-FKBP | WP_041519349.1 | Flavobacteria |
| <i>Flavobacterium hibernum</i>               | CYN-FKBP | WP_041519676.1 | Flavobacteria |
| <i>Flavobacterium hydatis</i>                | CYN-FKBP | WP_035622385.1 | Flavobacteria |
| <i>Flavobacterium hydatis</i>                | CYN-FKBP | WP_035626885.1 | Flavobacteria |
| <i>Flavobacterium indicum</i>                | CYN-FKBP | WP_014388319.1 | Flavobacteria |
| <i>Flavobacterium johnsoniae</i>             | CYN-FKBP | AAM92026       | Flavobacteria |
| <i>Flavobacterium johnsoniae</i>             | CYN-FKBP | AAM92027       | Flavobacteria |
| <i>Flavobacterium limnosediminis</i>         | CYN-FKBP | WP_023579025.1 | Flavobacteria |
| <i>Flavobacterium omnivorum</i>              | CYN-FKBP | SDH25424.1     | Flavobacteria |
| <i>Flavobacterium phragmitis</i>             | CYN-FKBP | SFD64262.1     | Flavobacteria |
| <i>Flavobacterium psychrophilum</i>          | CYN-FKBP | WP_034098691.1 | Flavobacteria |
| <i>Flavobacterium psychrophilum</i> JIP02/86 | CYN-FKBP | YP_001296758.1 | Flavobacteria |
| <i>Flavobacterium psychrophilum</i> JIP02/86 | CYN-FKBP | YP_001296759.1 | Flavobacteria |
| <i>Flavobacterium rivuli</i>                 | CYN-FKBP | WP_020211598.1 | Flavobacteria |
| <i>Flavobacterium reichenbachii</i>          | CYN-FKBP | WP_035684065.1 | Flavobacteria |
| <i>Flavobacterium saliperosum</i> S13        | CYN-FKBP | ESU26021.1     | Flavobacteria |
| <i>Flavobacterium seoulense</i>              | CYN-FKBP | WP_035657803.1 | Flavobacteria |
| <i>Flavobacterium seoulense</i>              | CYN-FKBP | WP_035658288.1 | Flavobacteria |
| <i>Flavobacterium sinopsychrotolerans</i>    | CYN-FKBP | SEN91439.1     | Flavobacteria |
| <i>Flavobacterium soli</i>                   | CYN-FKBP | WP_026705641.1 | Flavobacteria |
| <i>Flavobacterium</i> sp. ACAM 123           | CYN-FKBP | WP_016991130.1 | Flavobacteria |
| <i>Flavobacterium</i> sp. Leaf82             | CYN-FKBP | KQO32644.1     | Flavobacteria |
| <i>Flavobacterium subsaxonicum</i>           | CYN-FKBP | WP_026991669.1 | Flavobacteria |
| <i>Flavobacterium succinicans</i>            | CYN-FKBP | WP_024981134.1 | Flavobacteria |
| <i>Flavobacterium succinicans</i>            | CYN-FKBP | WP_024981364.1 | Flavobacteria |
| <i>Flavobacterium swingsii</i>               | CYN-FKBP | SFA88116.1     | Flavobacteria |
| <i>Flavobacterium urocaniciphilum</i>        | CYN-FKBP | SEP61984.1     | Flavobacteria |
| <i>Flavobacterium xinjiangense</i>           | CYN-FKBP | WP_073207629.1 | Flavobacteria |
| <i>Fluviicola taffensis</i> DSM 16823        | CYN-FKBP | WP_013686748.1 | Flavobacteria |
| <i>Formosa agariphila</i>                    | CYN-FKBP | CDF78794.1     | Flavobacteria |
| <i>Formosa haliotis</i>                      | CYN-FKBP | WP_066219441.1 | Flavobacteria |

|                                    |          |                |               |
|------------------------------------|----------|----------------|---------------|
| Formosa sp. Hel1_33_131            | CYN-FKBP | AOR27263.1     | Flavobacteria |
| Gaetbulibacter saemankumensis      | CYN-FKBP | WP_027136884.1 | Flavobacteria |
| Galbibacter marinus                | CYN-FKBP | WP_008991540.1 | Flavobacteria |
| Gelidibacter mesophilus            | CYN-FKBP | WP_027126492.1 | Flavobacteria |
| Gillisia limnaea                   | CYN-FKBP | WP_006989975.1 | Flavobacteria |
| Gillisia marina                    | CYN-FKBP | WP_010231874.1 | Flavobacteria |
| Gramella echinicola                | CYN-FKBP | WP_026933765.1 | Flavobacteria |
| Gramella forsetii                  | CYN-FKBP | CAL65762       | Flavobacteria |
| Gramella forsetii                  | CYN-FKBP | WP_011710397.1 | Flavobacteria |
| Gramella sp. LPB0144               | CYN-FKBP | APG58900.1     | Flavobacteria |
| Hyunsoonleella jejuensis           | CYN-FKBP | SEQ10693.1     | Flavobacteria |
| Imtechella halotolerans            | CYN-FKBP | WP_008239677.1 | Flavobacteria |
| Jejuia pallidilutea                | CYN-FKBP | WP_045372778.1 | Flavobacteria |
| Jejuia pallidilutea                | CYN-FKBP | GAL66646.1     | Flavobacteria |
| Kordia algicida OT-1               | CYN-FKBP | WP_007093789.1 | Flavobacteria |
| Kriegella aquimaris                | CYN-FKBP | SDM97151.1     | Flavobacteria |
| Lacinutrix jangbogonensis          | CYN-FKBP | WP_034057582.1 | Flavobacteria |
| Lacinutrix sp. 5H-3-7-4            | CYN-FKBP | WP_013870480.1 | Flavobacteria |
| Leeuwenhoekella blandensis         | CYN-FKBP | WP_009781285.1 | Flavobacteria |
| Leeuwenhoekella palythoae          | CYN-FKBP | WP_072983594.1 | Flavobacteria |
| Leeuwenhoekella marinoflava        | CYN-FKBP | WP_073099465.1 | Flavobacteria |
| Lishizhenia tianjinensis           | CYN-FKBP | SFT67407.1     | Flavobacteria |
| Lutibacter maritimus               | CYN-FKBP | SFS32105.1     | Flavobacteria |
| Lutibacter profundi                | CYN-FKBP | AMC10344.1     | Flavobacteria |
| Mangrovimonas yunxiaonensis        | CYN-FKBP | WP_036122544.1 | Flavobacteria |
| Maribacter aquivivus               | CYN-FKBP | SHJ89650.1     | Flavobacteria |
| Maribacter orientalis              | CYN-FKBP | SEL31201.1     | Flavobacteria |
| Maribacter sp. HTCC2170            | CYN-FKBP | WP_013306554.1 | Flavobacteria |
| Maribacter stanieri                | CYN-FKBP | SFR67453.1     | Flavobacteria |
| Mesoflavibacter zeaxanthinifaciens | CYN-FKBP | WP_010517508.1 | Flavobacteria |
| Muricauda antarctica               | CYN-FKBP | SFB76710.1     | Flavobacteria |
| Muricauda lutaonensis              | CYN-FKBP | WP_045800951.1 | Flavobacteria |
| Muricauda ruestringensis           | CYN-FKBP | WP_014031611.1 | Flavobacteria |
| Muricauda zhangzhouensis           | CYN-FKBP | SDQ56770.1     | Flavobacteria |
| Myroides guanonis                  | CYN-FKBP | SFJ87275.1     | Flavobacteria |
| Myroides injenensis                | CYN-FKBP | WP_010250164.1 | Flavobacteria |
| Myroides marinus                   | CYN-FKBP | KUF40224.1     | Flavobacteria |
| Myroides odoratimimus              | CYN-FKBP | EKB03227.1     | Flavobacteria |
| Myroides odoratus                  | CYN-FKBP | WP_060875118.1 | Flavobacteria |
| Myroides phaeus                    | CYN-FKBP | SDH72867.1     | Flavobacteria |
| Nonlabens dokdonensis              | CYN-FKBP | AGC75181.1     | Flavobacteria |
| Nonlabens marinus                  | CYN-FKBP | WP_041496246.1 | Flavobacteria |
| Nonlabens sedimins                 | CYN-FKBP | WP_042280300.1 | Flavobacteria |
| Nonlabens ulvanivorans             | CYN-FKBP | GAL75631.1     | Flavobacteria |
| Ochrovirga pacifica                | CYN-FKBP | WP_010134755.1 | Flavobacteria |
| Olleya marilimosa                  | CYN-FKBP | WP_028282856.1 | Flavobacteria |
| Owenweeksia hongkongensis          | CYN-FKBP | WP_014201615.1 | Flavobacteria |

|                                           |          |                |               |
|-------------------------------------------|----------|----------------|---------------|
| <i>Polaribacter atrinae</i>               | CYN-FKBP | WP_068449940.1 | Flavobacteria |
| <i>Polaribacter dokdonensis</i>           | CYN-FKBP | WP_053975013.1 | Flavobacteria |
| <i>Polaribacter irgensii</i>              | CYN-FKBP | WP_004570747.1 | Flavobacteria |
| <i>Polaribacter reichenbachii</i>         | CYN-FKBP | WP_068364573.1 | Flavobacteria |
| <i>Polaribacter</i> sp. MED152            | CYN-FKBP | WP_015480498.1 | Flavobacteria |
| <i>Polaribacter</i> sp. Hel1_85           | CYN-FKBP | WP_036821955.1 | Flavobacteria |
| <i>Polaribacter vadi</i>                  | CYN-FKBP | WP_065319140.1 | Flavobacteria |
| <i>Pricia antarctica</i>                  | CYN-FKBP | SDE04035.1     | Flavobacteria |
| <i>Psychroflexus gondwanensis</i>         | CYN-FKBP | WP_003436956.1 | Flavobacteria |
| <i>Psychroflexus sediminis</i>            | CYN-FKBP | SDG55100.1     | Flavobacteria |
| <i>Psychroflexus torquis</i>              | CYN-FKBP | AFU67563.1     | Flavobacteria |
| <i>Psychroflexus tropicus</i>             | CYN-FKBP | WP_019038212.1 | Flavobacteria |
| <i>Psychroserpens burtonensis</i>         | CYN-FKBP | WP_028873302.1 | Flavobacteria |
| <i>Psychroserpens damuponensis</i>        | CYN-FKBP | WP_040278254.1 | Flavobacteria |
| <i>Riemerella anatipestifer</i> DSM 15868 | CYN-FKBP | WP_013446672.1 | Flavobacteria |
| <i>Riemerella anatipestifer</i> RA-YM     | CYN-FKBP | EFT35731.1     | Flavobacteria |
| <i>Riemerella columbina</i>               | CYN-FKBP | WP_018676593.1 | Flavobacteria |
| <i>Riemerella columbipharyngis</i>        | CYN-FKBP | SDE47300.1     | Flavobacteria |
| <i>Robiginitalea biformata</i>            | CYN-FKBP | WP_015754216.1 | Flavobacteria |
| <i>Robiginitalea biformata</i> HTCC2501   | CYN-FKBP | WP_015755540.1 | Flavobacteria |
| <i>Runella limosa</i>                     | CYN-FKBP | WP_028522983.1 | Flavobacteria |
| <i>Salegentibacter mishustinae</i>        | CYN-FKBP | WP_057481232.1 | Flavobacteria |
| <i>Salegentibacter salegens</i>           | CYN-FKBP | WP_079734691.1 | Flavobacteria |
| <i>Salegentibacter salinarum</i>          | CYN-FKBP | WP_079713874.1 | Flavobacteria |
| <i>Salinimicrobium catena</i>             | CYN-FKBP | SDL76680.1     | Flavobacteria |
| <i>Sediminibacter</i> sp. Hel_I_10        | CYN-FKBP | WP_026752871.1 | Flavobacteria |
| <i>Sediminicola</i> sp                    | CYN-FKBP | WP_062055259.1 | Flavobacteria |
| <i>Soonwooa buanensis</i>                 | CYN-FKBP | WP_079665888.1 | Flavobacteria |
| <i>Tamlana nanhaiensis</i>                | CYN-FKBP | WP_044625819.1 | Flavobacteria |
| <i>Tenacibaculum dicentrarchi</i>         | CYN-FKBP | WP_058884629.1 | Flavobacteria |
| <i>Tenacibaculum maritimum</i>            | CYN-FKBP | WP_024741596.1 | Flavobacteria |
| <i>Tenacibaculum ovolyticum</i>           | CYN-FKBP | WP_028889491.1 | Flavobacteria |
| <i>Tenacibaculum</i> sp.                  | CYN-FKBP | WP_028891023.1 | Flavobacteria |
| <i>Ulvibacter litoralis</i>               | CYN-FKBP | SDE92800.1     | Flavobacteria |
| <i>Vitellibacter aquimaris</i>            | CYN-FKBP | WP_062622682.1 | Flavobacteria |
| <i>Wenyingzhuangia fucanilytica</i>       | CYN-FKBP | WP_068826390.1 | Flavobacteria |
| <i>Weeksella virosa</i> DSM 16922         | CYN-FKBP | WP_013598693.1 | Flavobacteria |
| <i>Winogradskyella psychrotolerans</i>    | CYN-FKBP | WP_020896060.1 | Flavobacteria |
| <i>Winogradskyella</i> sp                 | CYN-FKBP | WP_045468090.1 | Flavobacteria |
| <i>Xanthomarina gelatinilytica</i>        | CYN-FKBP | WP_007648709.1 | Flavobacteria |
| <i>Zhouia amylolytica</i>                 | CYN-FKBP | WP_038265805.1 | Flavobacteria |
| <i>Zobellia galactanivorans</i>           | CYN-FKBP | WP_013994175.1 | Flavobacteria |
| <i>Zobellia galactanivorans</i>           | CYN-FKBP | WP_013995030.1 | Flavobacteria |
| <i>Zobellia uliginosa</i>                 | CYN-FKBP | WP_038238738.1 | Flavobacteria |
| <i>Zunongwangia mangrovi</i>              | CYN-FKBP | SFC62278.1     | Flavobacteria |
| <i>Zunongwangia profunda</i> SM-A87       | CYN-FKBP | WP_013071163.1 | Flavobacteria |
| <i>Zunongwangia profunda</i> SM-A87       | CYN-FKBP | WP_013070348.1 | Flavobacteria |

## **Others**

|                                    |          |                |                          |
|------------------------------------|----------|----------------|--------------------------|
| Ancylostoma ceylanicum (Nematode)  | CYN-FKBP | EPB65547.1     | Nematode                 |
| Candidatus Ruthia magnifica        | CYN-FKBP | WP_011737713.1 | $\gamma$ -proteobacteria |
| Candidatus Thioglobus              | CYN-FKBP | WP_053820422.1 | $\gamma$ -proteobacteria |
| Chitinivibrio alkaliphilus ACht1   | CYN-FKBP | ERP38862.1     | Fibrobacteres            |
| Desulfobacterales bacterium        | CYN-FKBP | OGR19343.1     | $\delta$ -Proteobacteria |
| Desulfocapsa sulfexigens           | CYN-FKBP | AGF76656.1     | $\delta$ -Proteobacteria |
| Desulfobulbus propionicus DSM 2032 | CYN-FKBP | WP_015723644.1 | $\delta$ -Proteobacteria |
| Desulfotalea psychrophila          | CYN-FKBP | WP_011188886.1 | $\delta$ -Proteobacteria |
| Hyalella azteca                    | CYN-FKBP | XP_018019590.1 | Arthropod                |
| Nitrospira bacterium               | CYN-FKBP | KPK34464.1     | Nitrospira               |
